# Supplementary material
Source: HighWire-hosted journal article supplement (https://bmjopen.bmj.com/content/10/8/e039164)
Supplement: inline-supplementary-material-3 [file inline-supplementary-material-3.pdf]

**Supplement 3. Secondary outcome parameters.** Assessment periods are referenced to the date of spinal cord injury (SCI) diagnosis and include: screening and baseline (S&B; days 5-39), 3-month follow-up (3M; day 91 +/- 10), 6-month follow-up (6M; day 182 +/-10), 12-month follow-up (12M; day 365 +/-10). Additionally, some surveys are administered weekly during the TTNS treatment period (TTNS: weekly), and the bowel and bladder diaries are administered once every two weeks during the treatment period (TTNS: bi-weekly).

| Outcome and Measurement Parameter (analysis metric)                                                                                                                                     | Assessment Periods                |
|-----------------------------------------------------------------------------------------------------------------------------------------------------------------------------------------|-----------------------------------|
| <b>Occurrence of neurogenic detrusor overactivity (DO) jeopardizing the upper urinary tract over a 1-year time course assessed by: urodynamic investigation and clinical assessment</b> |                                   |
| DO amplitude $\geq 40$ cmH <sub>2</sub> O, or initiation of DO treatment with antimuscarinics and/or intradetrusor onabotulinumtoxinA injections (time-to-event analysis)               | S&B, 3M, 6M, 12M                  |
| <b>Differential changes in lower urinary tract (LUT) function, assessed by urodynamic investigation</b>                                                                                 |                                   |
| Maximum cystometric capacity (mL)                                                                                                                                                       | S&B, 3M, 6M, 12M                  |
| Compliance (mL/cmH <sub>2</sub> O)                                                                                                                                                      | S&B, 3M, 6M, 12M                  |
| DO (present or absent), if present:                                                                                                                                                     | S&B, 3M, 6M, 12M                  |
| Bladder volume at first DO (mL)                                                                                                                                                         | S&B, 3M, 6M, 12M                  |
| Maximum DO amplitude (cmH <sub>2</sub> O)                                                                                                                                               | S&B, 3M, 6M, 12M                  |
| Detrusor leak-point pressure (cmH <sub>2</sub> O)                                                                                                                                       | S&B, 3M, 6M, 12M                  |
| Maximum detrusor pressure during storage phase (cmH <sub>2</sub> O)                                                                                                                     | S&B, 3M, 6M, 12M                  |
| Maximum detrusor pressure during voiding phase (cmH <sub>2</sub> O)                                                                                                                     | S&B, 3M, 6M, 12M                  |
| Detrusor pressure at maximum flow rate (cmH <sub>2</sub> O)                                                                                                                             | S&B, 3M, 6M, 12M                  |
| Maximum flow rate (mL/s)                                                                                                                                                                | S&B, 3M, 6M, 12M                  |
| Voided volume (mL)                                                                                                                                                                      | S&B, 3M, 6M, 12M                  |
| Post void residual (mL)                                                                                                                                                                 | S&B, 3M, 6M, 12M                  |
| Pelvic floor electromyography (EMG) (normal/pathological)                                                                                                                               | S&B, 3M, 6M, 12M                  |
| Videography (vesico-uretero-renal reflux, present/absent)                                                                                                                               | S&B, 3M, 6M, 12M                  |
| Free flow curve pattern                                                                                                                                                                 | S&B, 3M, 6M, 12M                  |
| <b>Differential changes in lower spinal cord function, assessed by neuro-urological physical examination</b>                                                                            |                                   |
| Voluntary sphincter contraction (present/absent; if present, weak/strong)                                                                                                               | S&B, 3M, 6M, 12M                  |
| Resting anal tone (weak/strong/spastic)                                                                                                                                                 | S&B, 3M, 6M, 12M                  |
| Bulbocavernosus reflex (present/absent)                                                                                                                                                 | S&B, 3M, 6M, 12M                  |
| Anal reflex (present/absent)                                                                                                                                                            | S&B, 3M, 6M, 12M                  |
| Sensory testing S2-S5 (algnesia, aesthesia: present/absent, even between sides, type of sensation)                                                                                      | S&B, 3M, 6M, 12M                  |
| <b>Differential changes in LUT symptoms, assessed by bladder diary, International Prostate Symptom Score (IPSS), Urinary Symptom Profile (USP)</b>                                      |                                   |
| Number of voids per 24 hours                                                                                                                                                            | S&B, 3M, 6M, 12M, TTNS: bi-weekly |
| Number of day-time voids                                                                                                                                                                | S&B, 3M, 6M, 12M, TTNS: bi-weekly |
| Number of night-time voids                                                                                                                                                              | S&B, 3M, 6M, 12M, TTNS: bi-weekly |
| Number of intermittent catheterizations                                                                                                                                                 | S&B, 3M, 6M, 12M, TTNS: bi-weekly |
| Number of leakages per 24 hours                                                                                                                                                         | S&B, 3M, 6M, 12M, TTNS: bi-weekly |
| Number of used pads per 24 hours                                                                                                                                                        | S&B, 3M, 6M, 12M, TTNS: bi-weekly |
| Mean post void residual (mL)                                                                                                                                                            | S&B, 3M, 6M, 12M, TTNS: bi-weekly |
| Mean voided volume (mL)                                                                                                                                                                 | S&B, 3M, 6M, 12M, TTNS: bi-weekly |
| Pain level (scale, 0-10)                                                                                                                                                                | S&B, 3M, 6M, 12M, TTNS: bi-weekly |
| Level of urgency (scale, 0-4)                                                                                                                                                           | S&B, 3M, 6M, 12M, TTNS: bi-weekly |
| IPSS Symptom Score (sum score, 0-35)                                                                                                                                                    | S&B, 3M, 6M, 12M, TTNS: weekly    |
| USP Stress urinary incontinence score (sum score, 0-9)                                                                                                                                  | S&B, 3M, 6M, 12M, TTNS: weekly    |
| USP Overactive bladder score (sum score, 0-21)                                                                                                                                          | S&B, 3M, 6M, 12M, TTNS: weekly    |
| USP Low stream score (sum score, 0-9)                                                                                                                                                   | S&B, 3M, 6M, 12M, TTNS: weekly    |

**Differential changes in quality of life, assessed by IPSS, Qualiveen**

|                                                                      |                                |
|----------------------------------------------------------------------|--------------------------------|
| IPSS Quality of life score (scale, 0-6)                              | S&B, 3M, 6M, 12M, TTNS: weekly |
| Qualiveen total score (mean score, 0-4)                              | S&B, 3M, 6M, 12M, TTNS: weekly |
| Qualiveen Limitations / Inconvenience subscale (mean score, 0-4)     | S&B, 3M, 6M, 12M, TTNS: weekly |
| Qualiveen Constraints / Restrictions subscale (mean score, 0-4)      | S&B, 3M, 6M, 12M, TTNS: weekly |
| Qualiveen Fears subscale (mean score, 0-4)                           | S&B, 3M, 6M, 12M, TTNS: weekly |
| Qualiveen Feelings / Impact on Daily Life subscale (mean score, 0-4) | S&B, 3M, 6M, 12M, TTNS: weekly |

**Differential changes in sexual function, assessed by clinical assessment, FSFI (females), IIEF (males)**

|                                                                                        |                  |
|----------------------------------------------------------------------------------------|------------------|
| Psychogenic erection, M (present / reduced / absent / unknown / not applicable)        | S&B, 3M, 6M, 12M |
| Reflex erection, M (present / reduced / absent / unknown / not applicable)             | S&B, 3M, 6M, 12M |
| Ejaculation, M (present / reduced / absent / unknown / not applicable)                 | S&B, 3M, 6M, 12M |
| Orgasmic function, M, F (present / reduced / absent / unknown / not applicable)        | S&B, 3M, 6M, 12M |
| Psychogenic genital arousal, F (present / reduced / absent / unknown / not applicable) | S&B, 3M, 6M, 12M |
| Reflex genital arousal, F (present / reduced / absent / unknown / not applicable)      | S&B, 3M, 6M, 12M |
| Menstruation, F (present / reduced / absent / unknown / not applicable)                | S&B, 3M, 6M, 12M |
| FSFI, F total score (sum score, 0-36)                                                  | S&B, 3M, 6M, 12M |
| FSFI, F Desire domain (sum score, 0-6)                                                 | S&B, 3M, 6M, 12M |
| FSFI, F Arousal domain (sum score, 0-6)                                                | S&B, 3M, 6M, 12M |
| FSFI, F Lubrication domain (sum score, 0-6)                                            | S&B, 3M, 6M, 12M |
| FSFI, F Orgasm domain (sum score, 0-6)                                                 | S&B, 3M, 6M, 12M |
| FSFI, F Satisfaction domain (sum score, 0-6)                                           | S&B, 3M, 6M, 12M |
| FSFI, F Pain domain (sum score, 0-6)                                                   | S&B, 3M, 6M, 12M |
| IIEF, M total score (sum score, 5-75)                                                  | S&B, 3M, 6M, 12M |
| IIEF, M Erectile Function domain (sum score, 1-30)                                     | S&B, 3M, 6M, 12M |
| IIEF, M Orgasmic Function domain (sum score, 0-10)                                     | S&B, 3M, 6M, 12M |
| IIEF, M Sexual Desire domain (sum score, 2-10)                                         | S&B, 3M, 6M, 12M |
| IIEF, M Intercourse Satisfaction domain (sum score, 0-15)                              | S&B, 3M, 6M, 12M |
| IIEF, M Overall Satisfaction domain (sum score, 2-10)                                  | S&B, 3M, 6M, 12M |

**Differential changes in bowel symptoms, assessed by NBD, bowel diary**

|                                                                         |                                   |
|-------------------------------------------------------------------------|-----------------------------------|
| NBD Score (version from ISCoS Bowel Function Dataset) (sum score, 0-47) | S&B, 3M, 6M, 12M, TTNS: weekly    |
| Number of defecations per 24h                                           | S&B, 3M, 6M, 12M, TTNS: bi-weekly |
| Number of urgency episodes per 24h                                      | S&B, 3M, 6M, 12M, TTNS: bi-weekly |
| Quantity of stool per defecation (Small/Medium/Large)                   | S&B, 3M, 6M, 12M, TTNS: bi-weekly |
| Feeling of incomplete evacuation per 24h                                | S&B, 3M, 6M, 12M, TTNS: bi-weekly |
| Number of accidental bowel leakages per 24h                             | S&B, 3M, 6M, 12M, TTNS: bi-weekly |
| Quantity per bowel leakage (Small/Medium/Large)                         | S&B, 3M, 6M, 12M, TTNS: bi-weekly |
| Stool consistency score (Bristol Stool Scale)                           | S&B, 3M, 6M, 12M, TTNS: bi-weekly |
| Pain related to defecation (score)                                      | S&B, 3M, 6M, 12M, TTNS: bi-weekly |
| Medications for bowel                                                   | S&B, 3M, 6M, 12M, TTNS: bi-weekly |

**Differential changes in bowel function and pelvic floor function, assessed by rectal sensitivity examination, anorectal manometry, and barostat assessment**

|                                                                          |                  |
|--------------------------------------------------------------------------|------------------|
| Initial sensation (mL)                                                   | S&B, 3M, 6M, 12M |
| Urgency to defecate (mL)                                                 | S&B, 3M, 6M, 12M |
| Maximum tolerated volume (mL)                                            | S&B, 3M, 6M, 12M |
| Basal internal anal sphincter pressure (mmHg)                            | S&B, 3M, 6M, 12M |
| Squeeze external anal sphincter pressure (mmHg)                          | S&B, 3M, 6M, 12M |
| Relaxation internal anal sphincter pressure during defecation (% , mmHg) | S&B, 3M, 6M, 12M |
| Intraabdominal pressure during defecation (mmHg)                         | S&B, 3M, 6M, 12M |

|                                                                                                                                                                                                                                                                                     |                                |
|-------------------------------------------------------------------------------------------------------------------------------------------------------------------------------------------------------------------------------------------------------------------------------------|--------------------------------|
| Defecatory disorder (Rao Classification I-IV)                                                                                                                                                                                                                                       | S&B, 3M, 6M, 12M               |
| Rectal capacity (mL)                                                                                                                                                                                                                                                                | S&B, 3M, 6M, 12M               |
| Rectal compliance (mL/mmHg)                                                                                                                                                                                                                                                         | S&B, 3M, 6M, 12M               |
| <b>Differential changes in motor and sensory function, assessed by the International Standards for Neurological Classification of Spinal Cord Injury (ISNCSCI) protocol</b>                                                                                                         |                                |
| American Spinal Injury Association (ASIA) Impairment scale (AIS) Grade (A,B,C,D,E)                                                                                                                                                                                                  | S&B, 3M, 6M, 12M               |
| ISNCSCI upper extremity motor score (UEMS) (score, 0-50)                                                                                                                                                                                                                            | S&B, 3M, 6M, 12M               |
| ISNCSCI lower extremity motor score (LEMS) (score, 0-50)                                                                                                                                                                                                                            | S&B, 3M, 6M, 12M               |
| ISNCSCI light touch (LT) score (score, 0-112)                                                                                                                                                                                                                                       | S&B, 3M, 6M, 12M               |
| ISNCSCI pin prick (PP) score (score, 0-112)                                                                                                                                                                                                                                         | S&B, 3M, 6M, 12M               |
| <b>Differential changes in functional independence assessed by the Spinal Independence Measure (SCIM) III</b>                                                                                                                                                                       |                                |
| SCIM III Score (sum score, 0-100)                                                                                                                                                                                                                                                   | S&B, 3M, 6M, 12M               |
| <b>Differential changes in spasticity, assessed by Spinal Cord Injury Spasticity Evaluation Tool (SCI-SET), Modified Ashworth Scale (MAS)</b>                                                                                                                                       |                                |
| SCI-SET Score (sum score, -105 to +105; mean score: -3 to +3, number of positive responses, number of negative responses)                                                                                                                                                           | S&B, 3M, 6M, 12M, TTNS: weekly |
| Muscle tone of knee flexors and extensors (scale, 0-4)                                                                                                                                                                                                                              | S&B, 3M, 6M, 12M               |
| Muscle tone of elbow flexors and extensors (scale, 0-4)                                                                                                                                                                                                                             | S&B, 3M, 6M, 12M               |
| <b>Differential changes in brain and spinal cord function as well as cortico-spinal integrity, assessed using neurophysiological and neuroimaging methods: nerve conduction studies (NCS), EMG, electroencephalography (EEG), transcranial magnetic stimulation (TMS)</b>           |                                |
| Latencies and amplitudes of F-waves to electrical stimulation                                                                                                                                                                                                                       | S&B, 3M, 6M, 12M               |
| Compound muscle action potentials (cMAP)                                                                                                                                                                                                                                            | S&B, 3M, 6M, 12M               |
| Current perception thresholds (CPTs)                                                                                                                                                                                                                                                | S&B, 3M, 6M, 12M               |
| Sensory evoked potentials (SEPs): latencies and amplitudes in response to electrical nerve stimulation                                                                                                                                                                              | S&B, 3M, 6M, 12M               |
| Long latency sensory evoked potentials (LL-SEPs): latencies and amplitudes, in response to electrical nerve stimulation                                                                                                                                                             | S&B, 3M, 6M, 12M               |
| Sympathetic skin response (SSR): latencies and amplitudes                                                                                                                                                                                                                           | S&B, 3M, 6M, 12M               |
| Frequency and coherence measures of surface EMG and EEG                                                                                                                                                                                                                             | S&B, 3M, 6M, 12M               |
| Lower urinary tract sensory evoked potentials (LUTSEPs): latencies and amplitudes in response to electrical LUT stimulation                                                                                                                                                         | S&B, 3M, 6M, 12M               |
| Changes in white and grey matter area in the lumbosacral enlargement (LSE) and their relation to clinical outcomes                                                                                                                                                                  | S&B, 3M, 6M, 12M               |
| Changes in white and grey matter area in upper cervical spinal cord (at C2/C3M) and their relation to clinical outcomes                                                                                                                                                             | S&B, 3M, 6M, 12M               |
| Changes in white and grey matter volume of the conus medullaris (CM) and their relation to clinical outcomes                                                                                                                                                                        | S&B, 3M, 6M, 12M               |
| Changes in grey and white matter volume in the brain and their relation to clinical outcomes                                                                                                                                                                                        | S&B, 3M, 6M, 12M               |
| Changes in fractional anisotropy (FA) in the brain and spinal cord and their relation to clinical outcomes                                                                                                                                                                          | S&B, 3M, 6M, 12M               |
| Changes in diffusivity in the brain and spinal cord and their relation to clinical outcomes                                                                                                                                                                                         | S&B, 3M, 6M, 12M               |
| Changes in brain and spinal cord tissue microstructure and their relation to clinical outcomes                                                                                                                                                                                      | S&B, 3M, 6M, 12M               |
| Changes in brain function and connectivity during rest and electrical stimulation of the tibial nerve and their relation to clinical outcomes                                                                                                                                       | S&B, 3M, 6M, 12M               |
| <b>Differential changes in biochemical and molecular biomarkers in urine, blood, stool, and bladder tissue, assessed by histomorphology, enzyme-linked immunosorbent assay (ELISA), western blot, reverse transcription polymerase chain reaction (RT-PCR), microbiome analysis</b> |                                |
| Biomarkers reflecting oxidative stress (presence/absence and quantities of peptides, proteins, antibodies, and small molecules)                                                                                                                                                     | S&B, 3M, 6M, 12M               |
| Expression profile of messenger RNA (mRNA) and microRNA (miRNA) in urine and blood as well as their relation to clinical outcomes                                                                                                                                                   | S&B, 3M, 6M, 12M               |
| Changes in inflammatory markers in bladder tissue, blood, and urine, as well as their relation to clinical outcomes                                                                                                                                                                 | S&B, 3M, 6M, 12M               |
| Changes in levels of neurotransmitters (neurotrophins) in blood, and urine, as well as their relation to clinical outcomes                                                                                                                                                          | S&B, 3M, 6M, 12M               |
| Changes in the composition of urinary and stool microbiomes (analysed by sequencing and microbial culturing) and their relation to clinical outcomes                                                                                                                                | S&B, 3M, 6M, 12M               |
| Changes in the density / quality of afferent / efferent innervation of the bladder tissue and their relation to clinical outcomes                                                                                                                                                   | S&B 6M                         |

**Safety of TTNS, adverse events and serious adverse events as assessed by clinical record check and patient interview**

|                                                                                                                                                                                               |          |
|-----------------------------------------------------------------------------------------------------------------------------------------------------------------------------------------------|----------|
| Urinary tract infection (UTI) (number of occurrences and intensity/severity)                                                                                                                  | Any time |
| Infection other than UTI (number of occurrences and intensity/severity)                                                                                                                       | Any time |
| Skin irritation at the electrode site (number of occurrences and intensity/severity)                                                                                                          | Any time |
| Irritation-related symptoms (e.g. dysuria, hematuria) with a temporal link to a LUT intervention (i.e. immediately following the intervention) (number of occurrences and intensity/severity) | Any time |
| Neuro-urological deterioration (number of occurrences and intensity/severity)                                                                                                                 | Any time |
| Pressure ulcer (location, number of occurrences and intensity/severity)                                                                                                                       | Any time |
| Neurological deterioration (number of occurrences and intensity/severity)*                                                                                                                    | Any time |
| Increase in pain (number of occurrences and intensity/severity)*                                                                                                                              | Any time |
| Increase in spasticity (number of occurrences and intensity/severity)*                                                                                                                        | Any time |
| Deep vein thrombosis / pulmonary embolism (number of occurrences and intensity/severity)                                                                                                      | Any time |
| Autonomic dysreflexia (number of occurrences (suspected and verified) and intensity/severity)                                                                                                 | Any time |
| Transfer/admittance to an acute care facility (number of occurrences and intensity/severity)*                                                                                                 | Any time |

\*only events that qualify as adverse events and serious adverse events are recorded  
 cMAP compound muscle action potentials; CPTs, current perception thresholds; DO, detrusor overactivity; ELISA, enzyme-linked immunosorbent assay; EEG, electroencephalography; EMG, electromyography; F, female; FSFI, Female Sexual Function Index; IIEF, International Index of Erectile Dysfunction; IPSS, International Prostate Symptom Score; ISNCSCI, the International Standards for Neurological Classification of Spinal Cord Injury; LL-SEP, long latency sensory evoked potential; LUT, lower urinary tract; LUTSEP lower urinary tract sensory evoked potential; M, male; MAS, Modified Ashworth Scale; miRNA, microRNA; mRNA, messenger RNA; NBD, neurogenic bowel dysfunction; NCS, nerve conduction studies; RT-PCR, Reverse transcription polymerase chain reaction; S&B, screening and baseline; SCI, spinal cord injury; SCI-SET, Spinal Cord Injury Spasticity Evaluation Tool; SCIM, Spinal Cord Independence Measure; SEP, sensory evoked potentials; SSR, Sympathetic skin response; TMS, transcranial magnetic stimulation; TTNS, transcutaneous tibial nerve stimulation; USP Urinary Symptom Profile; UTI, urinary tract infection
